# Supplementary material for: Towards the complete small RNome of Acinetobacter baumannii
Source: PubMed Central journal article supplement (PMC5320573; doi:10.1099/mgen.0.000045), 2016-03-02

**Table S1:** Genomic context of *Acinetobacter baumannii* AB5075 sRNAs

| AB5075 designation | Genomic context                           | Upstream gene | Locus orientation | Downstream gene |
|--------------------|-------------------------------------------|---------------|-------------------|-----------------|
| ABUWs001           | IG                                        | <i>murI1</i>  | >>>               | ABUW_0085       |
| ABUWs002           | IG                                        | ABUW_0140     | <<<               | <i>xth</i>      |
| ABUWs003           | IG*                                       | ABUW_0157     | >>>               | ABUW_0158       |
| ABUWs004           | IG                                        | ABUW_0207     | ><>               | ABUW_0208       |
| ABUWs005           | IG                                        | ABUW_0211     | <><               | ABUW_2012       |
| ABUWs006           | IG                                        | ABUW_0219     | <>>               | ABUW_0220       |
| ABUWs007           | IG                                        | <i>suhB</i>   | >>>               | ABUW_0381       |
| ABUWs008           | IG                                        | ABUW_0436     | >>>               | ABUW_0437       |
| ABUWs009           | AS <sup>P</sup> (ABUW_0545)               | ABUW_0545     | <><               | ABUW_0546       |
| ABUWs010           | IG                                        | ABUW_0552     | <<>               | ABUW_0553       |
| ABUWs011           | OL <sup>P</sup> * (ABUW_0627)             | ABUW_0627     | <<<               | ABUW_0628       |
| ABUWs012           | IG                                        | ABUW_0651     | <<<               | <i>lysP</i>     |
| ABUWs013           | AS <sup>P</sup> (ABUWs0749)               | ABUW_0749     | ><>               | ABUW_0750       |
| ABUWs014           | IG                                        | ABUW_0764     | >>>               | ABUW_0765       |
| ABUWs015           | IG                                        | ABUW_0801     | ><>               | ABUW_0802       |
| ABUWs016           | IG                                        | ABUW_0880     | ><<               | <i>trpS</i>     |
| ABUWs017           | AS <sup>P</sup> ( <i>carA</i> )           | <i>carA</i>   | <>>               | ABUW_0895       |
| ABUWs018           | IG                                        | ABUW_0937     | <><               | ABUW_0938       |
| ABUWs019           | IG                                        | ABUW_1162     | <>>               | ABUW_1163       |
| ABUWs020           | IG                                        | ABUW_1263     | <><               | ABUW_1264       |
| ABUWs021           | AS <sup>P</sup> (ABUW_1267 and ABUW_1268) | ABUW_1267     | ><>               | ABUW_1268       |
| ABUWs022           | IG                                        | ABUW_1284     | >>>               | ABUW_1285       |
| ABUWs023           | IG                                        | ABUW_1310     | >>>               | ABUW_1311       |
| ABUWs024           | IG                                        | ABUW_1327     | <<>               | ABUW_1328       |
| ABUWs025           | AS <sup>P</sup> (ABUW_1402)               | ABUW_1402     | ><>               | ABUW_1403       |
| ABUWs026           | IG                                        | ABUW_1497     | <>>               | ABUW_1498       |
| ABUWs027           | OL <sup>P</sup> * (ABUW_1514)             | ABUW_1513     | >>>               | ABUW_1514       |
| ABUWs028           | OL <sup>P</sup> (ABUW_1616)               | <i>glnS</i>   | ><<               | ABUW_1616       |
| ABUWs029           | IG                                        | ABUW_1644     | <>>               | ABUW_1645       |
| ABUWs030           | IG                                        | ABUW_1746     | <><               | <i>recX</i>     |
| ABUWs031           | IG                                        | ABUW_1758     | >>>               | ABUW_1759       |
| ABUWs032           | IG                                        | ABUW_1764     | <><               | mobile element  |
| ABUWs033           | AS (ABUW_1773)                            | ABUW_1773     | <>>               | ABUW_1774       |
| ABUWs034           | IG                                        | ABUW_1815     | >>>               | <i>aro1</i>     |
| ABUWs035           | IG                                        | ABUW_1910     | <><               | ABUW_1911       |
| ABUWs036           | IG                                        | ABUW_1958     | >>>               | ABUW_1959       |
| ABUWs037           | IG                                        | ABUW_2060     | <<<               | ABUW_2061       |
| ABUWs038           | AS ( <i>acdP</i> )                        | <i>acdP</i>   | <><               | <i>pqqE</i>     |
| ABUWs039           | IG                                        | ABUW_2145     | <<<               | <i>rnd</i>      |
| ABUWs040           | AS <sup>P</sup> (ABUW_2275)               | ABUW_2275     | ><>               | ABUW_2276       |

|          |                             |             |     |              |
|----------|-----------------------------|-------------|-----|--------------|
| ABUWs041 | IG                          | ABUW_2313   | ><> | ABUW_2314    |
| ABUWs042 | AS <sup>P</sup> (ABUWs043)  | ABUWs043    | <>> | ABUW_2444    |
| ABUWs043 | AS <sup>P</sup> (ABUWs042)  | ABUW_2443   | <<> | ABUWs042     |
| ABUWs044 | IG                          | ABUW_2520   | <<< | ABUW_2521    |
| ABUWs045 | IG                          | ABUW_2551   | <>< | ABUW_2553    |
| ABUWs046 | IG                          | ABUW_2597   | <<> | ABUW_2598    |
| ABUWs047 | IG                          | ABUW_2629   | <<< | ABUW_2630    |
| ABUWs048 | IG                          | ABUW_2699   | ><< | ABUW_2700    |
| ABUWs049 | IG                          | ABUW_2702   | ><> | ABUW_2703    |
| ABUWs050 | OL <sup>P</sup> (ABUW_2704) | ABUW_2703   | ><< | ABUW_2704    |
| ABUWs051 | IG                          | ABUW_2704   | <<< | ABUW_2705    |
| ABUWs052 | IG                          | ABUW_2818   | <<> | ABUW_2819    |
| ABUWs053 | OL <sup>P</sup> (ABUW_0859) | ABUW_2859   | >>< | ABUW_2860    |
| ABUWs054 | IG                          | <i>lon</i>  | >>> | ABUW_2866    |
| ABUWs055 | OL (ABUW_2969)              | <i>betT</i> | <<< | ABUW_2969    |
| ABUWs056 | IG                          | ABUW_2991   | >>> | ABUW_2992    |
| ABUWs057 | AS (ABUW_3008)              | ABUW_3008   | <>< | ABUW_3009    |
| ABUWs058 | OL (ABUW_3011)              | ABUW_3011   | <<< | ABUW_3012    |
| ABUWs059 | IG                          | ABUW_3017   | <<< | <i>ggt</i>   |
| ABUWs060 | IG                          | ABUW_3025   | <>> | ABUW_3026    |
| ABUWs061 | IG                          | <i>sbcC</i> | ><< | ABUW_3030    |
| ABUWs062 | IG                          | ABUW_3080   | <<< | ABUW_3081    |
| ABUWs063 | OL ( <i>ispE</i> )          | <i>ispE</i> | >>> | ABUW_3093    |
| ABUWs064 | IG                          | ABUW_3102   | <>> | <i>ribB2</i> |
| ABUWs065 | IG                          | <i>nrdB</i> | ><> | ABUW_3186    |
| ABUWs066 | IG                          | ABUW_3194   | <<> | ABUW_3195    |
| ABUWs067 | IG                          | ABUW_3195   | ><< | ABUWs068     |
| ABUWs068 | IG                          | ABUWs067    | <<< | ABUWs069     |
| ABUWs069 | IG                          | ABUWs068    | <<< | ABUW_3196    |
| ABUWs070 | IG*                         | <i>rho</i>  | >>> | ABUW_3278    |
| ABUWs071 | IG                          | ABUW_3335   | <<> | ABUW_3336    |
| ABUWs072 | AS <sup>P</sup> (ABUWs073)  | ABUW_3353   | <>< | ABUWs073     |
| ABUWs073 | AS <sup>P</sup> (ABUWs072)  | ABUWs072    | ><< | ABUW_3354    |
| ABUWs074 | IG                          | <i>dctA</i> | <<< | ABUW_3450    |
| ABUWs075 | AS <sup>P</sup> (ABUW_3477) | ABUW_3477   | <>> | <i>rne</i>   |
| ABUWs076 | IG                          | ABUW_3520   | ><< | ABUWs077     |
| ABUWs077 | IG                          | ABUWs076    | <<< | <i>recD</i>  |
| ABUWs078 | IG                          | ABUW_3563   | >>< | <i>alkB</i>  |
| ABUWs079 | IG                          | ABUW_3618   | >>< | <i>phoU</i>  |
| ABUWs080 | IG                          | ABUW_3623   | >>> | <i>thiC</i>  |
| ABUWs081 | IG                          | ABUW_3707   | >>> | ABUW_3708    |
| ABUWs082 | IG                          | ABUW_3724   | ><< | ABUW_3725    |
| ABUWs083 | IG                          | ABUW_3804   | <>< | ABUW_3805    |
| ABUWs084 | IG                          | ABUW_3890   | >>> | ABUW_3891    |

---

**IG:** sRNA gene is located in an intergenic region; **AS:** sRNA gene is annotated antisense to existing annotation; **OL:** sRNA gene overlaps with an existing annotation in the same direction; **P:** sRNA and existing gene show only partial overlap (AS or OL), **\***: Transcript is located immediately upstream (or slightly overlaps) with existing transcript and might represent a riboswitch

**Table S2.** Possible Open Reading Frames ( $\geq 30$ aa) of the novel sRNA Annotation

| AB5075 designation    | Possible ORF #1                                                                                                            | Possible ORF #2                                                    | Possible ORF #3                                     |
|-----------------------|----------------------------------------------------------------------------------------------------------------------------|--------------------------------------------------------------------|-----------------------------------------------------|
| ABUWs010              | MVRRRNLYYFDKRRRKS SVYGPFFCVKFSFAAFWQTG*                                                                                    | LLFGRLDRAAIWLAVSFVTVFLPLFSLPLP*                                    |                                                     |
| ABUWs019              | MCKLLVSSRSGRTGEGHLRVCWLYLSPVCQPSFVLPP*                                                                                     |                                                                    |                                                     |
| ABUWs029              | VCRELVRPLFLYGRAEGGHLRVCWFLCFPVC*                                                                                           |                                                                    |                                                     |
| ABUWs030              | LFCNGSPAGGF AIVLCEPRQDRKVATVADL*                                                                                           |                                                                    |                                                     |
| ABUWs033              | LRYFVLKLVHGIRQYHGSQNSIHHSVLGLTMLRKS DKS F*                                                                                 |                                                                    |                                                     |
| ABUWs037              | VSMLHNIRQFFCMHIWEYDFDISHDEVRECRKCGKIHKMKSS<br>HKMT*                                                                        |                                                                    |                                                     |
| ABUWs038              | MSLEYSASCFAKSSCAKQMCSCCVKSDASWSNSLLG*                                                                                      | MLQHLPYAIQWLTF AVLGSAGYPEQLCKFECR*                                 |                                                     |
| ABUWs043              | MVAKRKRVSRLIPKPAHPRVSHRSSIKGTRGVTPKNVFLVRL<br>GRRSAKTD*                                                                    |                                                                    |                                                     |
| ABUWs044              | MAFCVLDCKRVGHYSLPAGHIASRSSRTDFDHIRIISSEE*                                                                                  |                                                                    |                                                     |
| ABUWs049              | MENIEQYAHGAEHEVHVHCKRSLSTLIISLFLVIATGR*                                                                                    |                                                                    |                                                     |
| ABUWs052              | MSFCVLDYKRVEYYSSHAGHIASRLSQTGKTKSICKILVLCVGNS<br>FAPFFSTVGRKGDTSGLVPLFPVCEPPFVLPP*                                         | VCLTTRGWNTILRMLATLPAGCRRPGKQSR YAKFLFCVSGT<br>RSPPFSLR*            | MQNSCFVCRELVRPLFLYGRAEGGHLWCAGSFV<br>SSLRTPFRSATII* |
| ABUWs053              | MIANEVRSVILKLSLGCSPAGLIPLSR YHLFRMVFCIFRAYAYPE*                                                                            |                                                                    |                                                     |
| ABUWs055 <sup>#</sup> | LTPVSGTLMIANLSSKGGTSDSDSPIWLRIFWSVVITIVSIGLLL<br>AGSFNSMQSAVVLGGLPFSV IILLYMFLAKALKQDDDFPNVA<br>KKQLAISKDISIPSNCDQNKVTEVL* |                                                                    |                                                     |
| ABUWs057              | MGLYVLQVLQLLNDLHHCLPPVGFVVFAG*                                                                                             |                                                                    |                                                     |
| ABUWs059              | LHLNSRKRRLNRSSCLRAACPLPRILVVWEPD*                                                                                          |                                                                    |                                                     |
| ABUWs066              | MLWQNSQNQELAMHIIHFLALS AKSYNDTT*                                                                                           |                                                                    |                                                     |
| ABUWs071              | MIDTLNIAHYPLLAGLHCQPALTGRIVKCIENLFFDVGTPVPLFC<br>CGRTEGGRLVRAGSLLSVCQPTFVLPP*                                              | LCVLVLYQSVNPLSFCHHNSKMLWQNSQYKGVGYAYSF<br>YTSRLVLIGFDELLVYQALAFFV* |                                                     |
| ABUWs073              | VYNRPSLVAVGRVRDTFGCADSLLSVCPELLVLP*                                                                                        | LPAGCRRPISKGIRLFLRSSLVCTIVPRSLR*                                   |                                                     |
| ABUWs075              | MSIPYQTSNKEVTSRPM TVKVINQCTAHPPVKQKGIPI*                                                                                   | MHRSPASEAKRNSDLKVEAVLPTSQTRIEAKAKCSR*                              |                                                     |

<sup>#</sup>: Gene is overlapping with previously annotated protein-coding ORF

\*: Stop Codon

**Table S3:** Expression values for newly annotated sRNAs.

| AB5075 designation | Expression value | AB5075 designation | Expression value |
|--------------------|------------------|--------------------|------------------|
| ABUWs001           | 12,158.95        | ABUWs045           | 90.78            |
| ABUWs002           | 877.04           | ABUWs046           | 1,383.10         |
| ABUWs003           | 482.22           | ABUWs047           | 1,175.83         |
| ABUWs004           | 102.46           | ABUWs048           | 31.4             |
| ABUWs005           | 991.3            | ABUWs049           | 6,143.89         |
| ABUWs006           | 251.92           | ABUWs050           | 736.1            |
| ABUWs007           | 302.2            | ABUWs051           | 565.4            |
| ABUWs008           | 179.71           | ABUWs052           | 1,368.06         |
| ABUWs009           | 36.13            | ABUWs053           | 284,098.13       |
| ABUWs010           | 22,418.36        | ABUWs054           | 526.85           |
| ABUWs011           | 374.51           | ABUWs055           | 107.72           |
| ABUWs012           | 22.5             | ABUWs056           | 3,138.08         |
| ABUWs013           | 142.08           | ABUWs057           | 8.29             |
| ABUWs014           | 130.92           | ABUWs058           | 7,443.86         |
| ABUWs015           | 123.34           | ABUWs059           | 156,653.40       |
| ABUWs016           | 281.19           | ABUWs060           | 3,577.83         |
| ABUWs017           | 273.43           | ABUWs061           | 1,259.13         |
| ABUWs018           | 1,100.91         | ABUWs062           | 57,927.94        |
| ABUWs019           | 1,230.10         | ABUWs063           | 245.75           |
| ABUWs020           | 79.16            | ABUWs064           | 71.08            |
| ABUWs021           | 78.93            | ABUWs065           | 104.87           |
| ABUWs022           | 93.62            | ABUWs066           | 382.59           |
| ABUWs023           | 74,148.04        | ABUWs067           | 1,079.45         |
| ABUWs024           | 2,334.28         | ABUWs068           | 237.64           |
| ABUWs025           | 145              | ABUWs069           | 359.29           |
| ABUWs026           | 1,744.26         | ABUWs070           | 136.74           |
| ABUWs027           | 49.65            | ABUWs071           | 1,057.05         |
| ABUWs028           | 41.56            | ABUWs072           | 31.96            |
| ABUWs029           | 3,457.92         | ABUWs073           | 1,443.66         |
| ABUWs030           | 128,302.13       | ABUWs074           | 16,548.30        |
| ABUWs031           | 19.69            | ABUWs075           | 302.59           |
| ABUWs032           | 168.5            | ABUWs076           | 8,578.37         |
| ABUWs033           | 59.45            | ABUWs077           | 9,421.04         |
| ABUWs034           | 985.65           | ABUWs078           | 297.38           |
| ABUWs035           | 5,937.10         | ABUWs079           | 796.81           |
| ABUWs036           | 2,939.89         | ABUWs080           | 398.49           |
| ABUWs037           | 783.5            | ABUWs081           | 345.3            |
| ABUWs038           | 26.1             | ABUWs082           | 3,285.49         |
| ABUWs039           | 43.5             | ABUWs083           | 992.07           |
| ABUWs040           | 29.85            | ABUWs084           | 187.48           |
| ABUWs041           | 107.47           |                    |                  |
| ABUWs042           | 1,806.25         |                    |                  |
| ABUWs043           | 240.85           |                    |                  |
| ABUWs044           | 2,495.15         |                    |                  |

Figure S1:

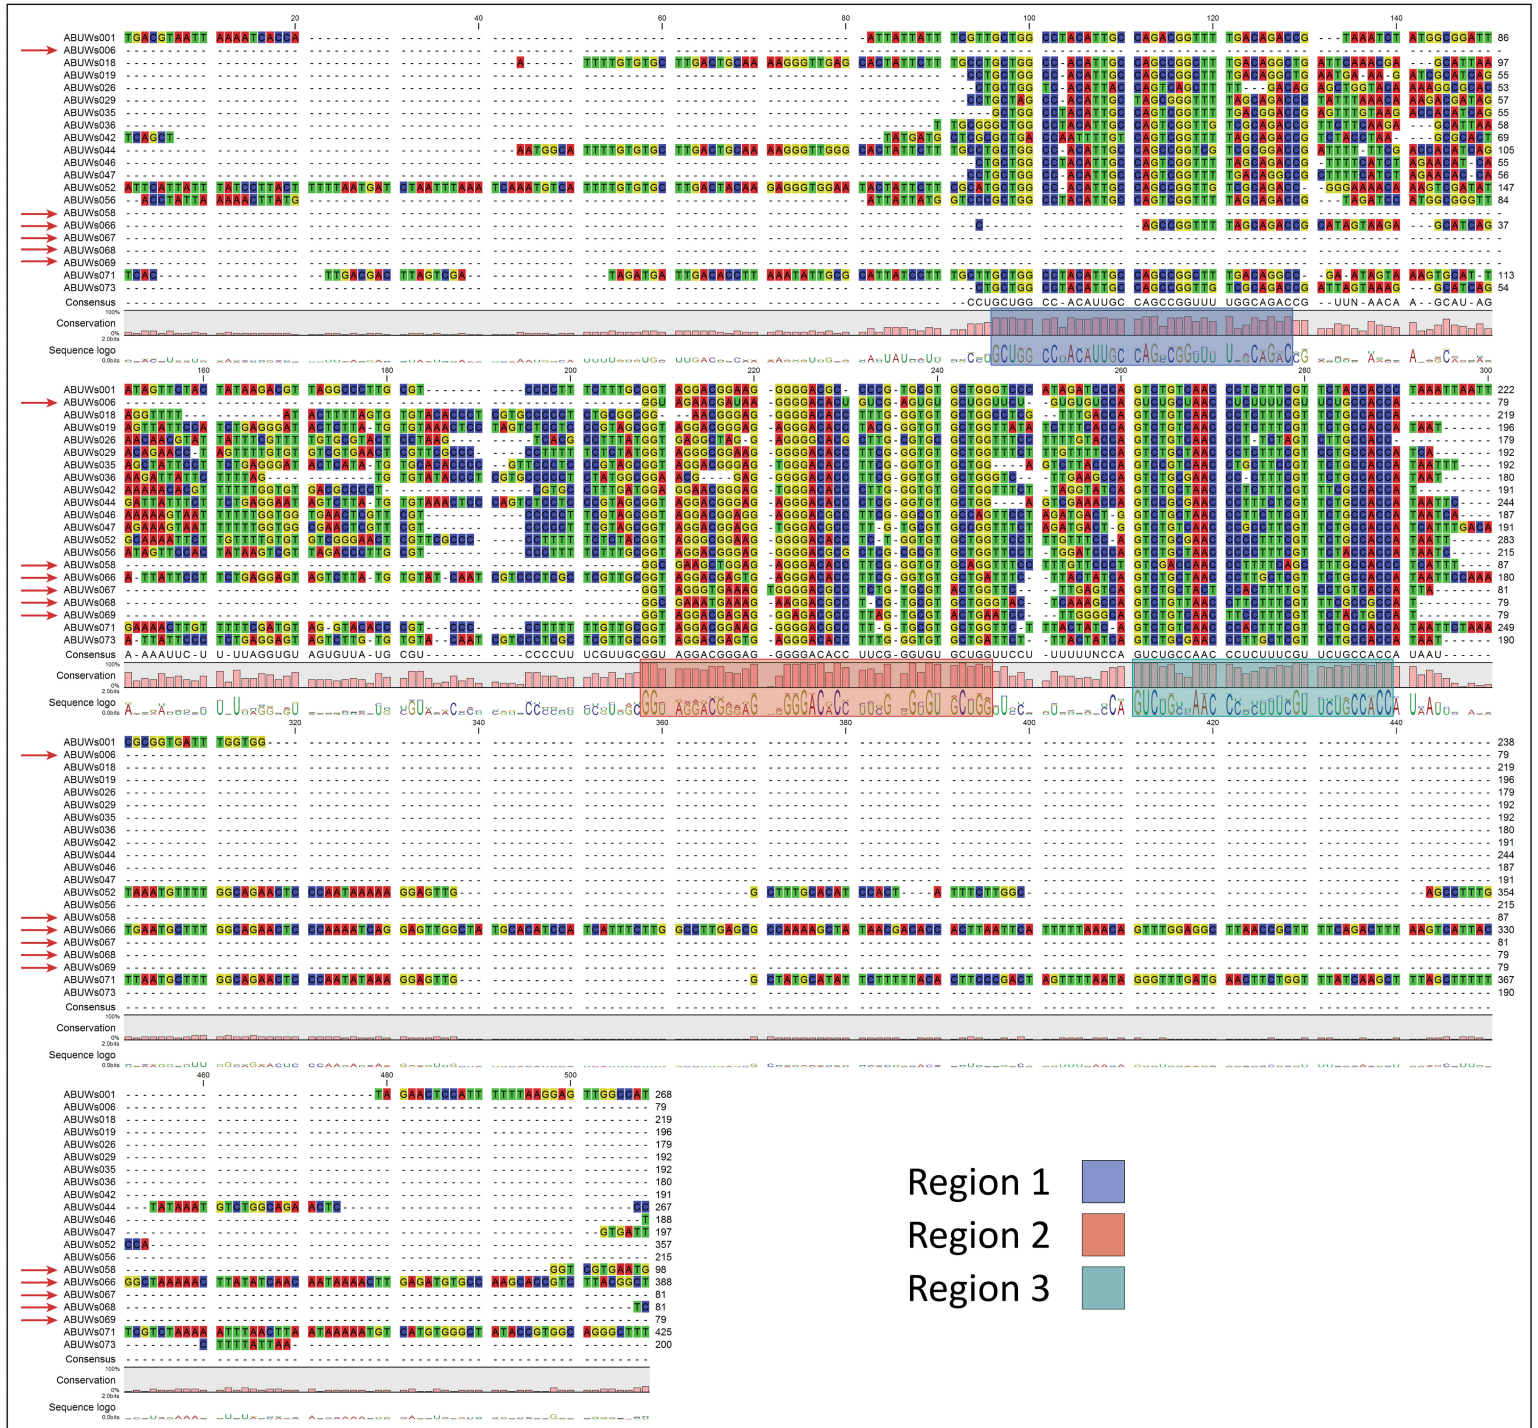

Region 1  
Region 2  
Region 3

Figure S2:

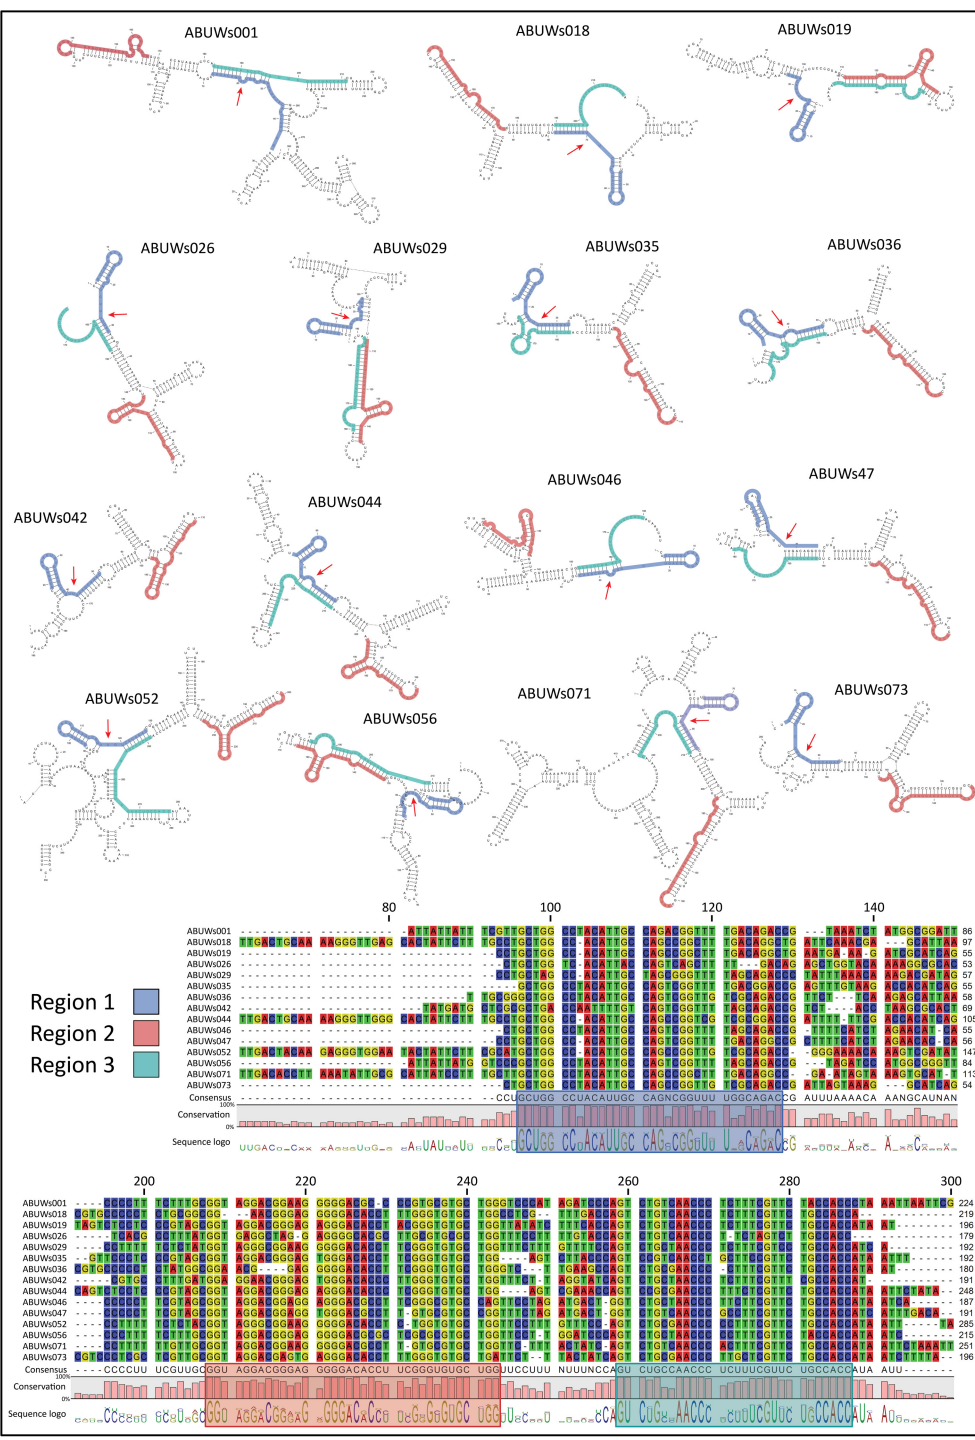

Figure S3(a):

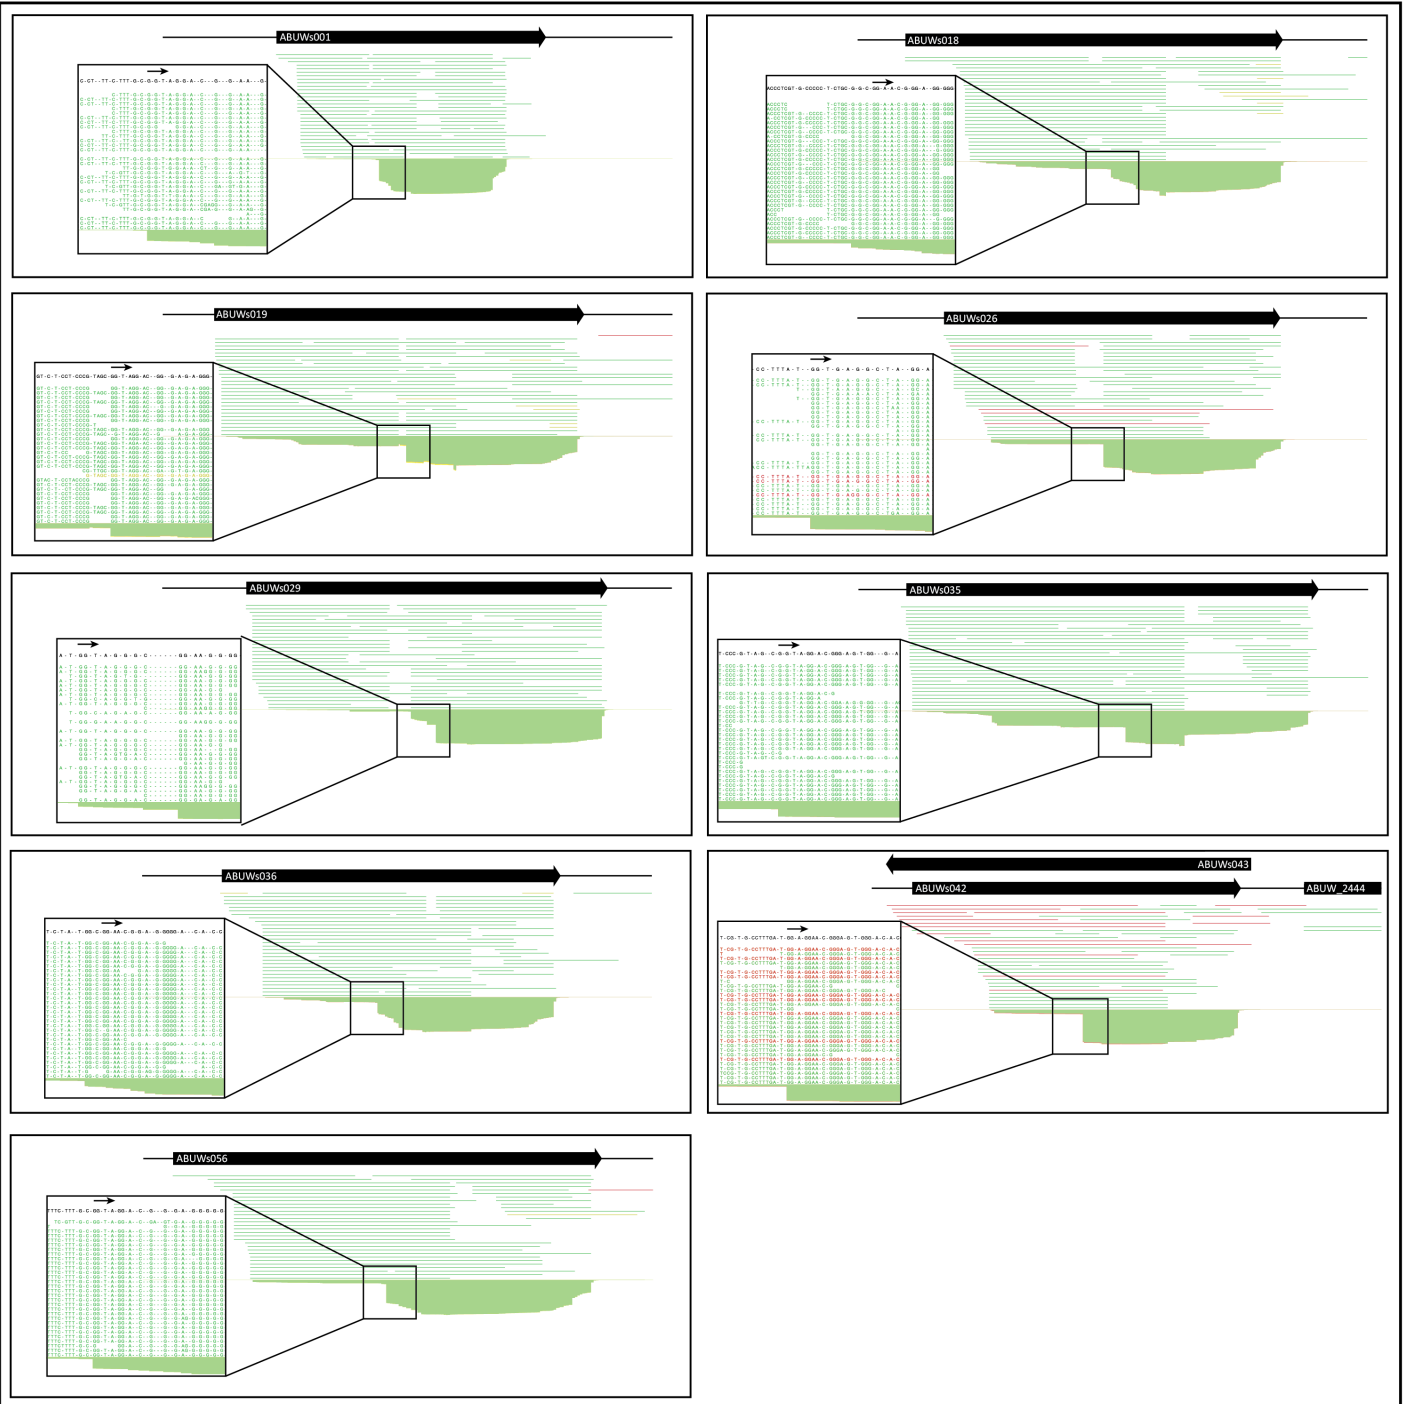



Figure S3(b):

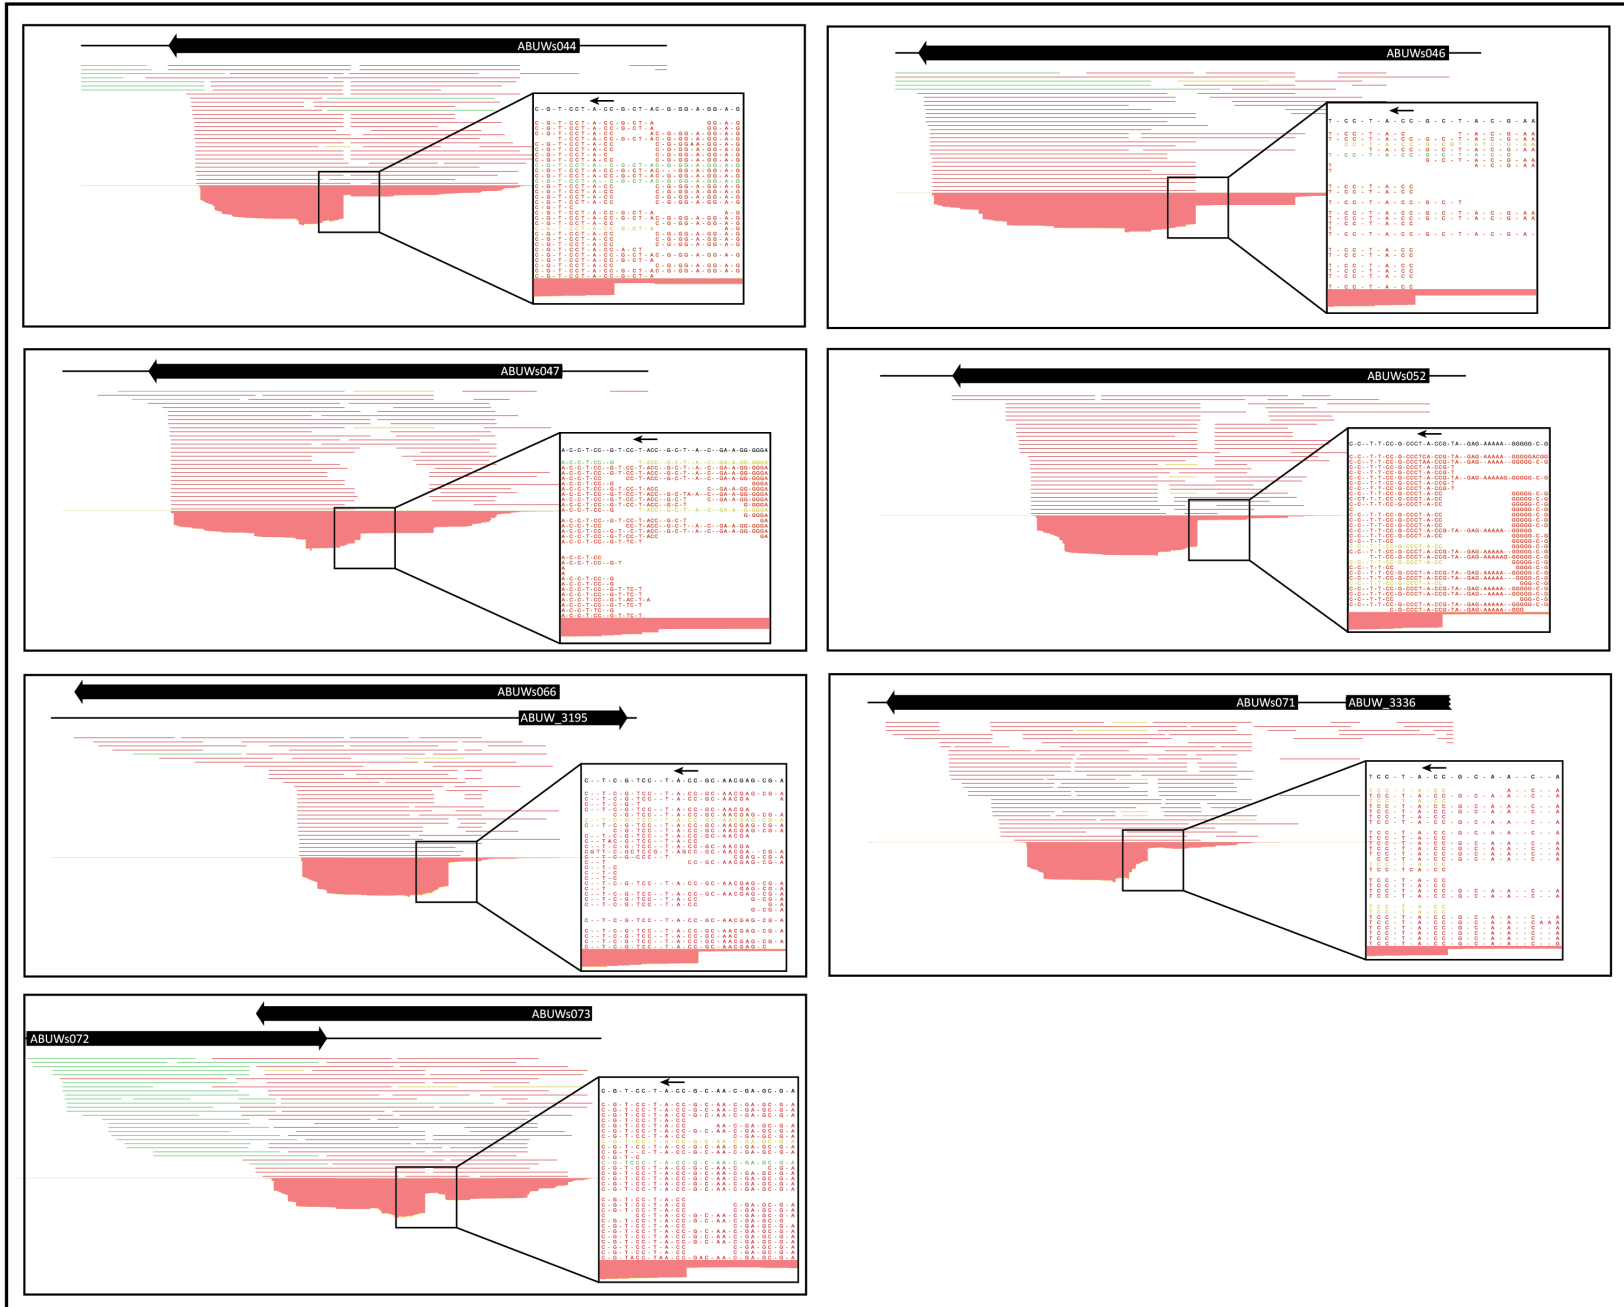

Figure S4:

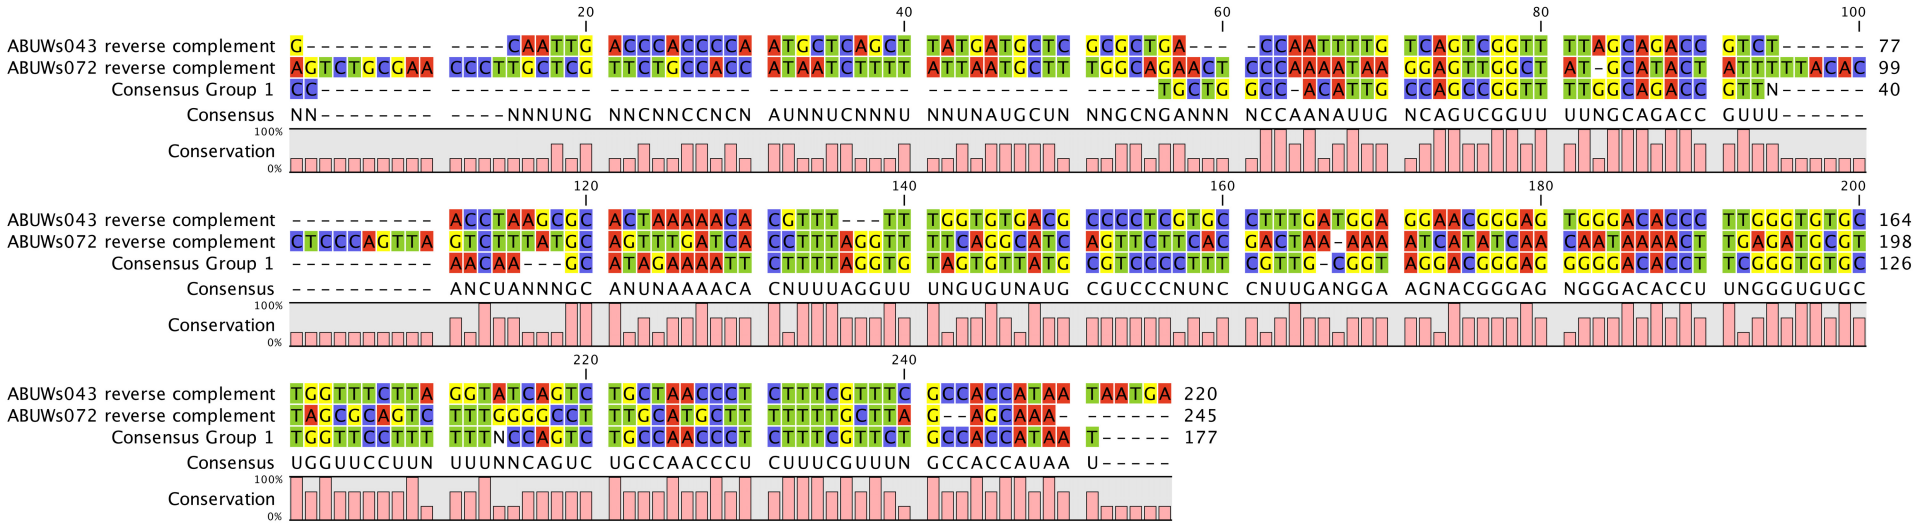

Figure S5:

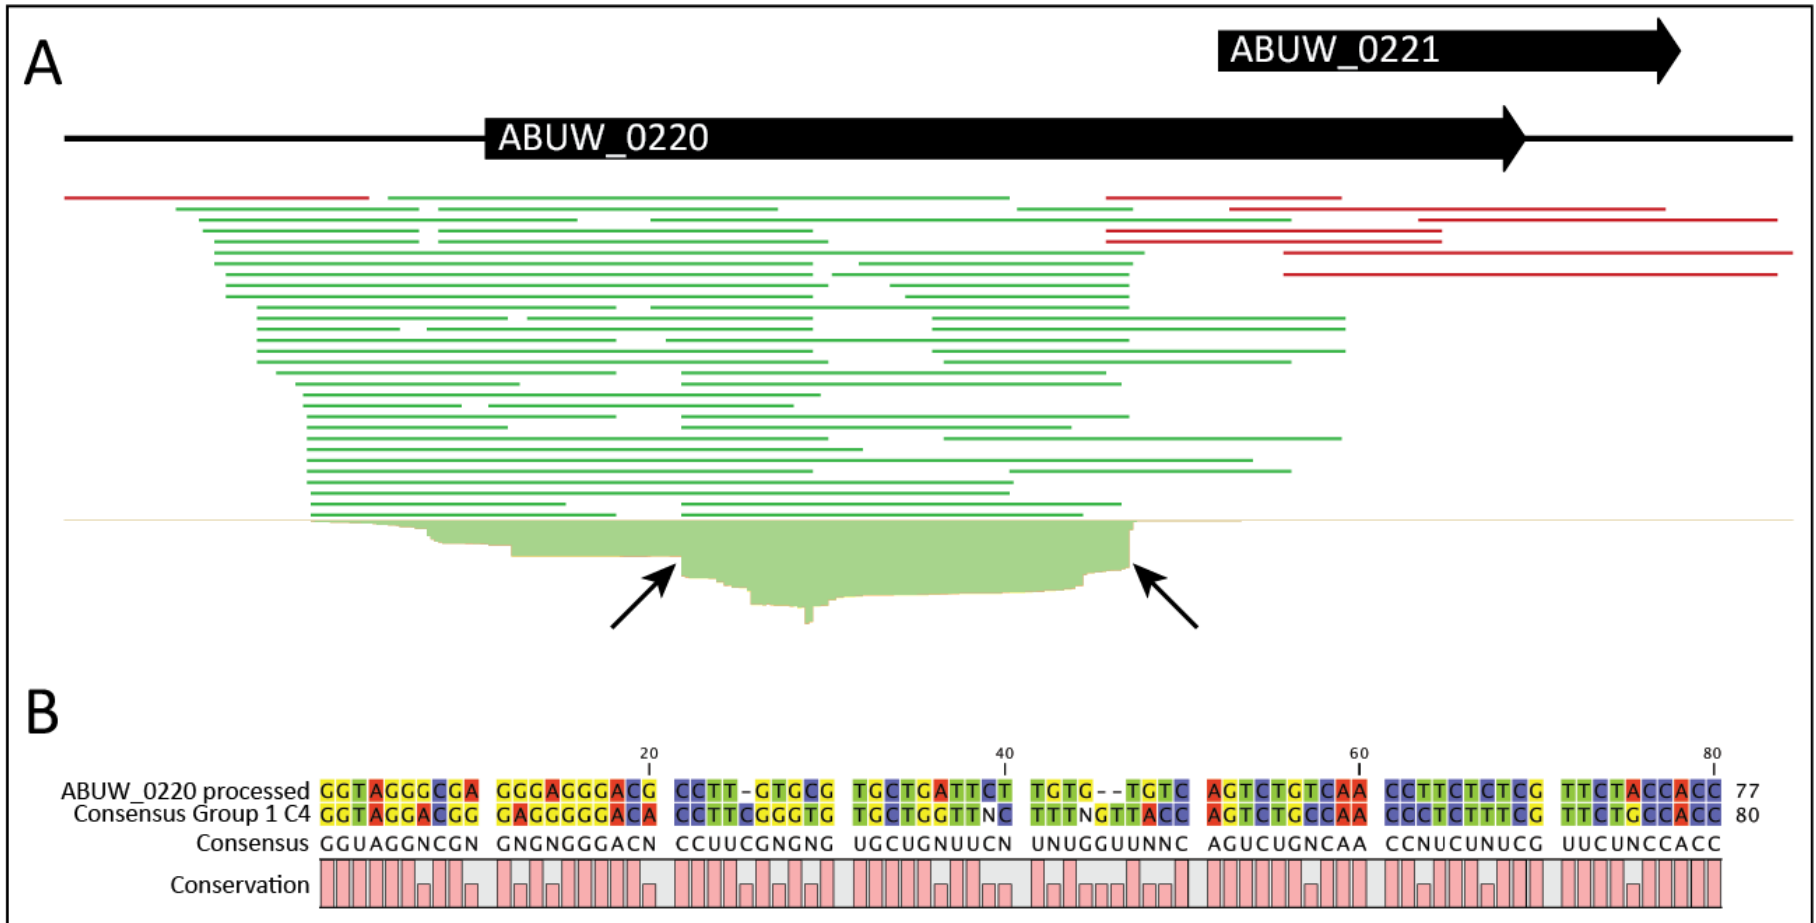

Supplement: mgen-02-45-s001.pdf [file mgen-02-45-s001.pdf]
